# Supplementary material
Source: Springer Nature journal article supplement (https://www.springermedizin.de/resource/supplementary/12875_2013_1190_MOESM2_ESM.pdf/9435562)
Supplement: MOESM2 [file 9435562]

## Annex II. Schedule of Events

|                                                       | AT THE SAME TIME *    |                 | W.2 | W.3 | W.4 | W.5 | W.6 | W.7 | W.8                    |
|-------------------------------------------------------|-----------------------|-----------------|-----|-----|-----|-----|-----|-----|------------------------|
|                                                       | W. 0                  | W.1             |     |     |     |     |     |     |                        |
|                                                       | Screening<br>V. (-1)* | V.1<br>( basal) | V.2 | V.3 | V.4 | V.5 | V.6 | V.7 | V.8 or<br>End of study |
| Inclusion-Exclusion Criteria                          | x                     | x               | X   | x   | x   | x   | x   | x   | x                      |
| Patient Information Sheet<br>Informed Consent         | x                     | x               |     |     |     |     |     |     |                        |
| Demographic Data Registry                             |                       | x               |     |     |     |     |     |     |                        |
| Braden scale                                          |                       | x               |     |     |     |     |     |     | x                      |
| PrU-II photographic registry                          |                       | x               |     |     |     |     |     |     | x                      |
| PrU-II basal characteristics                          |                       | x               |     |     |     |     |     |     |                        |
| PUSH scale registry                                   |                       | x               | x   | x   | x   | x   | x   | x   | x                      |
| Randomization                                         |                       | x               |     |     |     |     |     |     |                        |
| Transverse care**                                     |                       |                 |     |     |     |     |     |     |                        |
| Positional changing                                   |                       |                 | x   | x   | x   | x   | x   | x   | x                      |
| Reduction of friction                                 |                       |                 | x   | x   | x   | x   | x   | x   | x                      |
| Prevention of infection                               |                       |                 | x   | x   | x   | x   | x   | x   | x                      |
| Reason for changing dressing                          |                       |                 |     |     |     |     |     |     |                        |
| Per protocol                                          |                       |                 | x   | x   | x   | x   | x   | x   | x                      |
| Other reasons***                                      |                       |                 | x   | x   | x   | x   | x   | x   | x                      |
| Time recorded (mm:ss)                                 |                       |                 | x   | x   | x   | x   | x   | x   | x                      |
| Number of study dressings<br>used and material needed |                       |                 | x   | x   | x   | x   | x   | x   | x                      |
| Comfort<br>(patients/nurses)                          |                       |                 |     |     |     |     |     |     | x                      |
| Concomitant medications                               |                       | x               | x   | x   | x   | x   | x   | x   | x                      |
| Adverse Events                                        |                       | x               | x   | x   | x   | x   | x   | x   | x                      |

W: week; V: visit; CRF: Case Report Form; mm:ss: minutes and seconds  
\*Patients who agree to participate at the screening visit can undergo all of the procedures of Visit 1 at the same time. V1 could occur no later than 24 h after the screening visit.  
\*\*Positional changes, reduction of friction and prevention of infection should be recorded in each patient's diary and on the CRF.  
\*\*\* Changes in dressing between study visits should be recorded on the CRF.
